# Supplementary material for: Necessity and Content of Swing Phase Gait Coordination Training Post Stroke; A Case Report
Source: MDPI journal article supplement (doi:10.3390/brainsci11111498), 2021-11-12
Supplement: s1 [file s1]

**SUPPLEMENTARY FILE OF TABLE S1 AND FIGURES S1, S2, S3, AND S4**

**Table S1. Muscle Activation Latencies During Two Static Body Knee Flexion Motor Tasks**

| A. Task and Muscles                                                                                   | B. Pre (ms)    | C. Post (ms)  |
|-------------------------------------------------------------------------------------------------------|----------------|---------------|
| <b>1. Sidelying Knee Flexion with Hip in Neutral Static Position</b>                                  |                |               |
| <b>Knee Flexors</b>                                                                                   |                |               |
| Short Head Biceps Femoris                                                                             | 520<br>(± 200) | 250<br>(±130) |
| Long Head Biceps Femoris                                                                              | 520<br>(±190)  | 220<br>(±90)  |
| <b>Knee Extensors</b>                                                                                 |                |               |
| Vastus Medialis                                                                                       | 540<br>(±190)  | 300<br>(±160) |
| Vastus Lateralis                                                                                      | 560<br>(±170)  | 320<br>(±120) |
| <b>2. Standing Knee Flexion with Right Limb in Trailing Limb Position and Toe Touching the Ground</b> |                |               |
| <b>Knee Flexors</b>                                                                                   |                |               |
| Short Head Biceps Femoris                                                                             | 510<br>(±80)   | 250<br>(±120) |
| Long Head Biceps Femoris                                                                              | 450<br>(±82)   | 210<br>(±140) |
| <b>Knee Extensors</b>                                                                                 |                |               |
| Vastus Medialis                                                                                       | 650<br>(±150)  | 280<br>(±150) |
| Vastus Lateralis                                                                                      | 648<br>(±140)  | 300<br>(±130) |

**Figure S1. Tibialis Anterior (Ankle Dorsiflexor) Muscle Activation Latencies During Walking at Chose Speed**

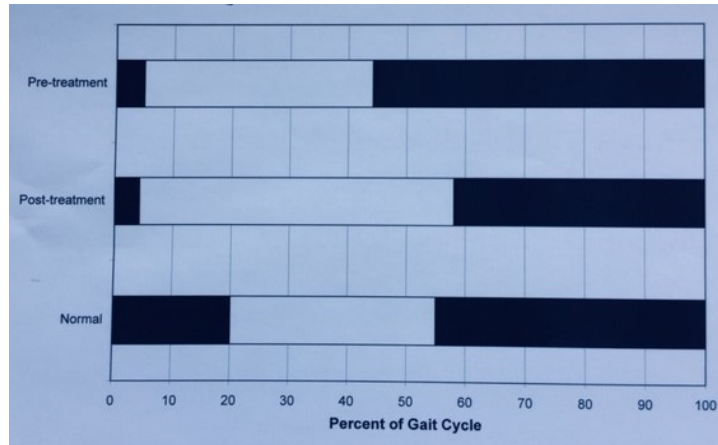

Figure S1. shows improvement toward normal (bottom panel) from Pre (top panel) to Post-treatment (middle panel) at the beginning of swing phase (60%)

**Figure S2. Hamstrings (Long Head, Biceps Femoris, Knee Flexors) Muscle Activation Latencies During Walking at Chose Speed**

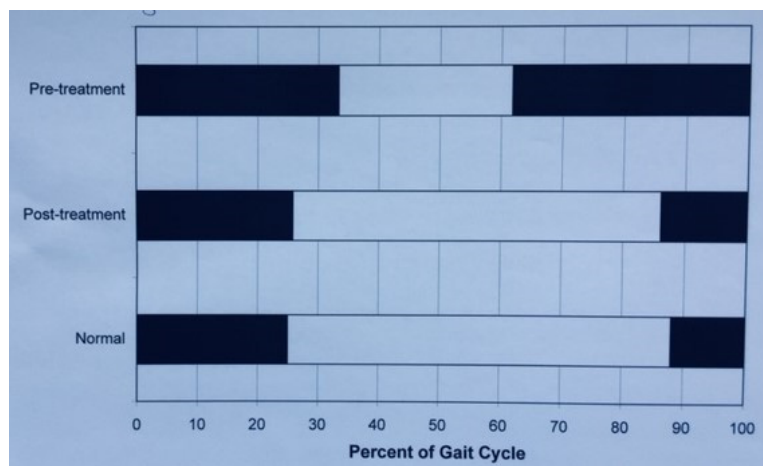

Figure S2. shows improvement toward normal (bottom panel) from Pre (top panel) to Post-treatment (middle panel) during stance phase and during swing phase (60 - 100%).

**Figure S3. Quadriceps (Knee Extensors) Muscle Activation Latencies During Walking at Chose Speed**

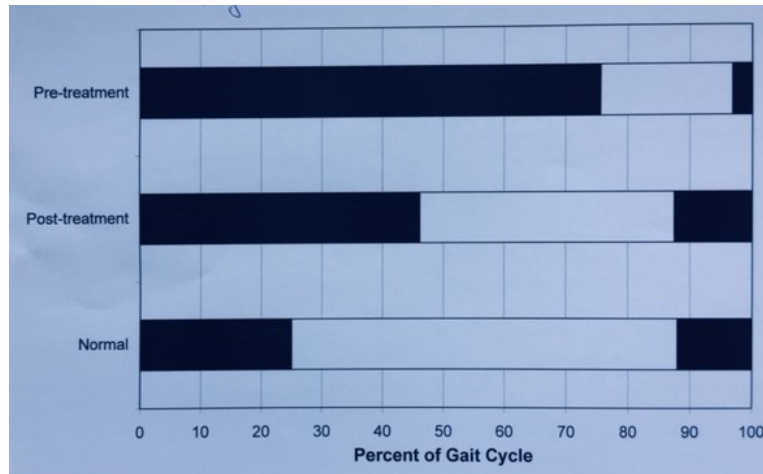

Figure S3. shows improvement toward normal (bottom panel) from Pre (top panel) to Post-treatment (middle panel) during stance phase and during swing phase (60 - 100%).

**Figure S4. Gluteus Maximus (Hip Extensors) Muscle Activation Latencies During Walking at Chose Speed**

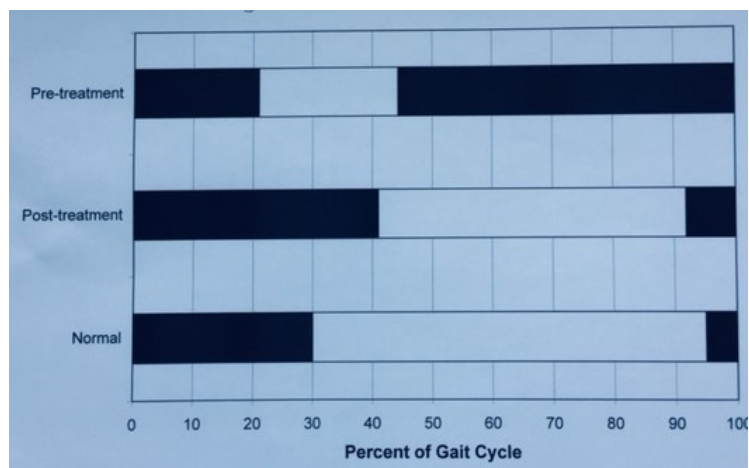

Figure S4. shows improvement toward normal (bottom panel) from Pre (top panel) to Post-treatment (middle panel) during stance phase and during swing phase (60 - 100%).
